# Supplementary material for: The Energy Metabolism in Caenorhabditis elegans under The Extremely Low-Frequency Electromagnetic Field Exposure
Source: PubMed Central journal article supplement (PMC4329544; doi:10.1038/srep08471), 2015-02-16
Supplement: srep08471-s1.pdf [file srep08471-s1.pdf]

## **Supplementary Information**

### **The Energy Metabolism in *Caenorhabditis elegans* under The Extremely Low-Frequency Electromagnetic Field Exposure**

Zhenhua Shi<sup>1,2</sup>, Hui Yu<sup>1</sup>, Yongyan Sun<sup>1,2</sup>, Chuanjun Yang<sup>1</sup>, Huiyong Lian<sup>1</sup>, Peng Cai<sup>1,\*</sup>

<sup>1</sup>Physical Environment Group, Key Laboratory of Urban Environment and Health, Institute of Urban Environment, Chinese Academy of Sciences, 1799 Jimei Road, Xiamen 361021, P. R. China;

<sup>2</sup>University of the Chinese Academy of Sciences, 19 Yuquan Road, Beijing 100049, P. R. China;

\*To whom correspondence should be addressed. E-mail: [pcai@iue.ac.cn](mailto:pcai@iue.ac.cn)

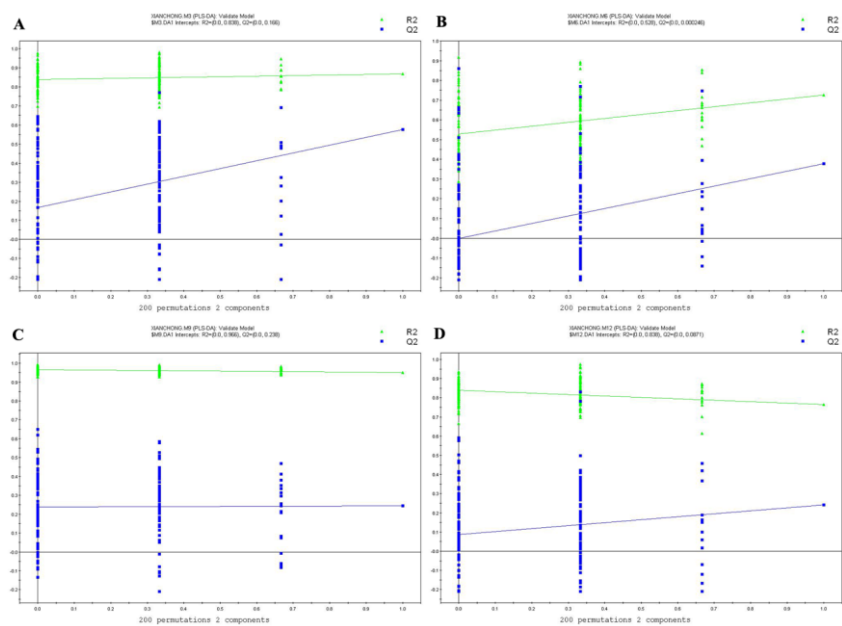

**Figure S1.** Permutation test results for PLS-DA model. (A) For 0.5 mT, (B) For 1 mT, (C) For 2 mT, and (D) For 3 mT. Two hundred Permutations were Performed, and the resulting  $R^2$  and  $Q^2$  value were Plotted.

**Table S1.** The primers used are listed as follows.

| <b>Genes</b> | <b>Forward primer (5'- 3')</b> | <b>Reverse primer (5'- 3')</b> |
|--------------|--------------------------------|--------------------------------|
| actin-1      | GCTGGACGTGATCTTACTGATTACC      | GTAGCAGAGCTTCTCCTTGATGTC       |
| C50D2.7      | GTTCTTGTATGCCGTTTA             | CTACCAATGAGTGGGTCT             |
| gpi-1        | GCACTTTGTCGCACTTTC             | CACCAACCCAATCCCAGA             |
| pfk-1        | GCAGCCGTCCGCTCTTAT             | CTCCGTTCATTGCCCAGT             |
| aldo-1       | TACATCTCGGGAGTCATCAT           | ACGACACCCTTGTCAACC             |
| aldo-2       | GAACTCTTCTCAAGCCAAAC           | TTACGGTAGCCAATCCAA             |
| tpi-1        | TGCTACAAAGTGCCAAAGG            | CATGACGACGTTCCGAGT             |
| fbp-1        | GCCTGGAAAGGAAATGGT             | CGATGGAAGGGTCAAGAGT            |
| gpd-1        | CACCAGATGTTTCCGTCGTT           | GGCGAGGATTCCCTTCAT             |
| gpd-4        | ATCTTCAAGGAGGAGCCA             | GCACGATGCGTTAGAAATA            |
| pgk-1        | AGTTCAAATCCATCTCCCAGTG         | GGCCCAACATCAAGTCCC             |
| ipgm-1       | TGGCAGTCAAGAACAACA             | CACCTCCGTCAGAAACA              |
| enol-1       | TTGCCACTGGACAAATCA             | CAGCGTAAACAGCATCAG             |
| pyk-1        | TTGGGAAGCAGAAAGGGAGTC          | TTCGGATGAATGAAGCAAAGAT         |
| pyk-2        | ACTATCGGACCAGCGTGTA            | GCATGTGCCTCGTGAGTT             |
| pdha-1a      | ATGAAGCGTTGAAGATTG             | ATGGCTGGACGATAGTTT             |
| pdha-1b      | GAAGAAGCACGGTGATAAG            | TGAACTCGCAAATTGGAC             |
| dlat-1       | GAAGTGGACCAGGAGGAC             | CCAGATACGGCTTGAGTT             |
| pck-1        | AGAAGAGTCGCTGGTGGA             | ACTTGGGTGTCGAGGAAG             |
| pyc-1        | GAACGGTCCAACACTACTCCT          | TCCTGGTCTACTGCGAAC             |

**Table S2.** Results of lifespan.

| <b>Groups</b> | <b>M (day)</b> | <b>m (day)</b> | <b>n</b> | <b>SD</b> |
|---------------|----------------|----------------|----------|-----------|
| Control       | 30             | 20.94          | 182      | 2.44      |
| 12 h          | 30             | 20.34          | 151      | 1.73      |
| 24 h          | 30             | 21.32          | 164      | 1.09      |
| 36 h          | 30             | 20.78          | 139      | 2.33      |
| 48 h          | 30             | 21.87          | 178      | 2.8       |
| WL            | 30             | 20.9           | 174      | 2.62      |

M: maximum life; m: mean life; n: number; SD: standard deviation of mean life; WL: whole life
